# Supplementary material for: Neural and Behavioral Predictors of Treatment Efficacy on Mood Symptoms and Cognition in Mood Disorders: A Systematic Review
Source: PubMed Central journal article supplement (PMC6071514; doi:10.3389/fpsyt.2018.00337), 2018-07-26
Supplement: Table_6.pdf [file Table_6.pdf]

**Table 6: Cognitive performance - Biomarkers of treatment response on cognition**

| Author                  | Paradigm                                | Measure   | Patients | N              | Study design     | Treatment group             | Finding                                                                                                                                                                                                                                                                                                                                                                                                                                                                                                                                                                                       |
|-------------------------|-----------------------------------------|-----------|----------|----------------|------------------|-----------------------------|-----------------------------------------------------------------------------------------------------------------------------------------------------------------------------------------------------------------------------------------------------------------------------------------------------------------------------------------------------------------------------------------------------------------------------------------------------------------------------------------------------------------------------------------------------------------------------------------------|
| Miskowiak et al. (2016) | RAVLT (objective) and CPFQ (subjective) | Behaviour | BD & UD  | 39 TGs, 40 HCs | RCT double-blind | EPO (8 weeks / 8 infusions) | For EPO-treated patients with objective memory dysfunction at baseline (n = 16) (defined as RAVLT total recall $\leq$ 43), the odds of a clinically relevant memory improvement were increased by a factor of 290.6 (95% CI, 2.7-31,316.4; P = .02) compared to patients with no baseline impairment (n = 23). Subjective cognitive complaints (measured with the Cognitive and Physical Functioning Questionnaire) and longer illness duration were associated with small increases in patients' chances of treatment efficacy on memory (53% and 16% increase, respectively; P $\leq$ .04). |

|                   |                                                                                                                                                                                                                                              |           |         |                |                  |                             |                                                                                                                                                                                                                                                                                                                                                     |
|-------------------|----------------------------------------------------------------------------------------------------------------------------------------------------------------------------------------------------------------------------------------------|-----------|---------|----------------|------------------|-----------------------------|-----------------------------------------------------------------------------------------------------------------------------------------------------------------------------------------------------------------------------------------------------------------------------------------------------------------------------------------------------|
| Ott et al. (2016) | Objective cognitive function covering domains of attention, memory and executive function (RAVLT, RBANS coding, verbal fluency test with the letter D, WAIS-III letter-number sequencing, TMTB, RVP); subjective cognitive complaints (CPFQ) | Behaviour | BD & UD | 39 TGs, 40 HCs | RCT double-blind | EPO (8 weeks / 8 infusions) | EPO improved speed of complex cognitive processing across affective disorders at weeks 9 and 14. In EPO-treated patients, baseline cognitive impairment increased the odds of treatment-efficacy on cognition at weeks 9 and 14 by a factor 9.7 and 9.9 respectively. Subjective cognitive complaints did not affect chances of treatment-efficacy. |
|-------------------|----------------------------------------------------------------------------------------------------------------------------------------------------------------------------------------------------------------------------------------------|-----------|---------|----------------|------------------|-----------------------------|-----------------------------------------------------------------------------------------------------------------------------------------------------------------------------------------------------------------------------------------------------------------------------------------------------------------------------------------------------|
